# Supplementary material for: Combined Detection of Plasma ZIC1, HOXD10 and RUNX3 Methylation is a Promising Strategy for Early Detection of Gastric Cancer and Precancerous Lesions
Source: PubMed Central journal article supplement — J Cancer. 2017 Apr 8;8(6):1038–44. doi: 10.7150/jca.18169 (PMC5436257; doi:10.7150/jca.18169), 2017-04-08
Supplement: jcav08p1038s1.pdf [file jcav08p1038s1.pdf]

**Table S1.** Primer sequences used in methylation-specific PCR

| <b>Primer</b>      | <b>Sequence, 5'-3'</b>        | <b>Annealing temperature</b> |
|--------------------|-------------------------------|------------------------------|
| <i>p16</i> -MF     | TTATTAGAGGGTGGGGCGGATCGC      | 60°C                         |
| <i>p16</i> -MR     | GACCCCGAACCGCGACCGTAA         |                              |
| <i>p16</i> -UF     | TTATTAGAGGGTGGGGTGGATTGT      | 60°C                         |
| <i>p16</i> -UR     | CAACCCCAAACCACAACCATAA        |                              |
| <i>DAPK</i> -MF    | GGATAGTCGGATCGAGTTAACGTC      | 60°C                         |
| <i>DAPK</i> -MR    | CCCTCCCAAACGCCGA              |                              |
| <i>DAPK</i> -UF    | GGAGGATAGTTGGATTGAGTTAATGTT   | 60°C                         |
| <i>DAPK</i> -UR    | CAAATCCCTCCCAAACACCAA         |                              |
| <i>ZIC1</i> -MF    | GGATTTTTTGTTCGTAATC           | 56°C                         |
| <i>ZIC1</i> -MR    | CCCGTTAACCACGTAAACG           |                              |
| <i>ZIC1</i> -UF    | GGGATTTTTTGTTCGTAATC          | 56°C                         |
| <i>ZIC1</i> -UR    | CCCATTAACCACATTAACA           |                              |
| <i>Kltho</i> -MF   | GTCGTCGTTGTAGTTCGTTATC        | 62°C                         |
| <i>Kltho</i> -MR   | CAACAAACGCCGATAATAACG         |                              |
| <i>Kltho</i> -UF   | TTGTTGTTGTTGTAGTTTGTATT       | 62°C                         |
| <i>Kltho</i> -UR   | CCAACAAACACCAATAATAAC         |                              |
| <i>HOXD10</i> -MF  | TTATT TATGG GGATT CGGGT TC    | 52°C                         |
| <i>HOXD10</i> -MR  | AAAAA AACCG AATCC AAAAC AAACG |                              |
| <i>HOXD10</i> -UF  | ATTTA TTTAT GGGGA TTTGG GTTT  | 52°C                         |
| <i>HOXD10</i> -UR  | AAAAA AACCA AATCC AAAAC AAACA |                              |
| <i>RUNX3</i> -MF   | TTACGAGGGGCGGTTCGTACGCGGG     | 62°C                         |
| <i>RUNX3</i> -MR   | AAAACGACCGACGCGAACGCCTCC      |                              |
| <i>RUNX3</i> -UF   | TTATGAGGGGTGGTTGTATGTGGG      | 62°C                         |
| <i>RUNX3</i> -UR   | AAAACAACCAACACAAACACCTCC      |                              |
| <i>RASSF1A</i> -MF | GTGTTAACGCGTTGCGTATC          | 60°C                         |
| <i>RASSF1A</i> -MR | AACCCCGCGAACTAAAAACGA         |                              |
| <i>RASSF1A</i> -UF | TTTGGTTGGAGTGTGTTAATGTG       | 60°C                         |
| <i>RASSF1A</i> -UR | CAAACCCACAAACTAAAAACAA        |                              |

*DAPK*, Death-associated protein kinase; *ZIC1*, Zinc finger of the cerebellum 1; *HOXD10*, Homeobox D10; *RUNX3*, Runt-related transcription factor 3; *RASSF1A*, Ras association domain family 1A

**Table S2.** Correlation between histopathologic characteristics and methylation status of *ZIC1*, *HOXD10* and *RUNX3* in plasma from gastric cancer patients

| Characteristics       | N   | <i>ZIC1</i> |    | <i>P</i> value | <i>HOXD10</i> |    | <i>P</i> value | <i>RUNX3</i> |    | <i>P</i> value |
|-----------------------|-----|-------------|----|----------------|---------------|----|----------------|--------------|----|----------------|
|                       |     | M           | U  |                | M             | U  |                | M            | U  |                |
| Location              |     |             |    |                |               |    |                |              |    |                |
| Antrum                | 85  | 65          | 20 | 0.056          | 39            | 46 | 0.778          | 33           | 52 | 0.119          |
| Corpus                | 37  | 22          | 15 |                | 18            | 19 |                | 20           | 17 |                |
| Tumor size            |     |             |    |                |               |    |                |              |    |                |
| <5cm                  | 70  | 51          | 19 | 0.230          | 31            | 39 | 0.987          | 32           | 38 | 0.546          |
| ≥5cm                  | 45  | 28          | 17 |                | 20            | 25 |                | 18           | 27 |                |
| Differentiation       |     |             |    |                |               |    |                |              |    |                |
| Well/Moderately       | 41  | 28          | 13 | 0.924          | 20            | 21 | 0.559          | 14           | 27 | 0.178          |
| Poorly                | 81  | 56          | 25 |                | 35            | 46 |                | 38           | 43 |                |
| Lymph node metastasis |     |             |    |                |               |    |                |              |    |                |
| N0                    | 56  | 38          | 18 | 0.672          | 22            | 34 | 0.208          | 24           | 32 | 1.000          |
| N1-3                  | 63  | 45          | 18 |                | 32            | 31 |                | 27           | 36 |                |
| Tumor invasion depth  |     |             |    |                |               |    |                |              |    |                |
| T1                    | 40  | 27          | 13 | 0.704          | 12            | 28 | 0.023          | 18           | 22 | 0.737          |
| T2-4                  | 79  | 56          | 23 |                | 41            | 38 |                | 33           | 46 |                |
| Distant metastasis    |     |             |    |                |               |    |                |              |    |                |
| M0                    | 113 | 78          | 35 | 0.433          | 51            | 62 | 1.000          | 49           | 64 | 0.138          |
| M1                    | 8   | 7           | 1  |                | 4             | 4  |                | 1            | 7  |                |
| TNM Stage             |     |             |    |                |               |    |                |              |    |                |
| I-II                  | 63  | 46          | 17 | 0.488          | 25            | 38 | 0.184          | 28           | 35 | 0.467          |
| III-IV                | 58  | 39          | 19 |                | 30            | 28 |                | 22           | 36 |                |

*ZIC1*, Zinc finger of the cerebellum 1; *HOXD10*, Homeobox D10; *RUNX3*, runt-related transcription factor 3; M = Methylated; U = Unmethylated.
